# Supplementary material for: SHP2 as a Potential Therapeutic Target in Diffuse-Type Gastric Carcinoma Addicted to Receptor Tyrosine Kinase Signaling
Source: Cancers (Basel). 2021 Aug 26;13(17):4309. doi: 10.3390/cancers13174309 (PMC8430696; doi:10.3390/cancers13174309)
Supplement: Supplementary file 1 [file cancers-13-04309-s001.zip]

Archive with 4 entries (4 files):
- File S1.pdf
- __MACOSX/._Full immunoblot data rev2.pdf
- __MACOSX/._Supplementary Figures rev2.docx
- Supplementary Figures.pdf
